# Supplementary material
Source: PubMed Central journal article supplement (PMC3347297)
Supplement: supp_86.10.5877_FigS1.pdf [file supp_86.10.5877_FigS1.pdf]

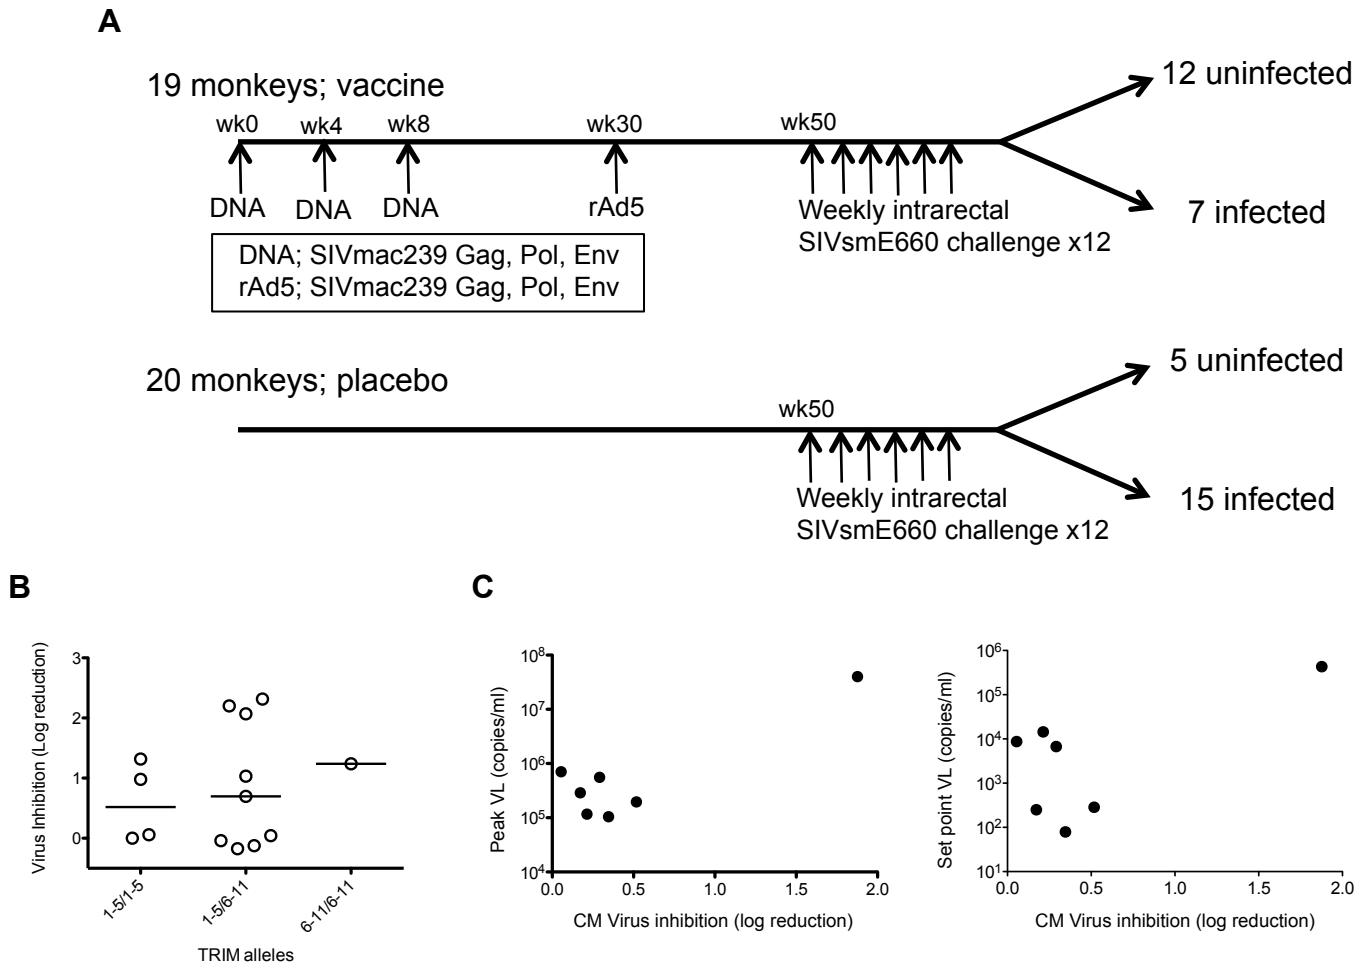

**Figure S1. TRIM5 $\alpha$  variants with VIA.**

Mamu\*A01 rhesus monkeys. (vaccine group; n=19, placebo group; n=20) (B) The sequences of amino acid residues 328–479 of the TRIM5 $\alpha$  B30.2 (SPRY) domain encoded by alleles 1–5 are identical to each other and to those described previously as rhesus macaque TRIM5 $\alpha$  (AY625001). In contrast, a 2 amino acid deletion (339–340) and 3 nsSNPs (A333S, P341Q and S422L) are present in the B30.2 (SPRY) domain of TRIM5 $\alpha$  variants encoded by alleles 6–11. The pooled data for VIA within EM CD8<sup>+</sup> T cells from the 3 groups are shown. No significant differences were detected. (C) Simple linear regressions predicting mean peak log<sub>10</sub> VL (left) and mean log<sub>10</sub> VL from week 6 to 9 after infection (right) by VIA within the CM CD8<sup>+</sup> T cell population at week 16 after rAd5 boost (n=7).
