# Supplementary material
Source: PubMed Central journal article supplement (PMC3347297)
Supplement: supp_86.10.5877_FigS2.pdf [file supp_86.10.5877_FigS2.pdf]

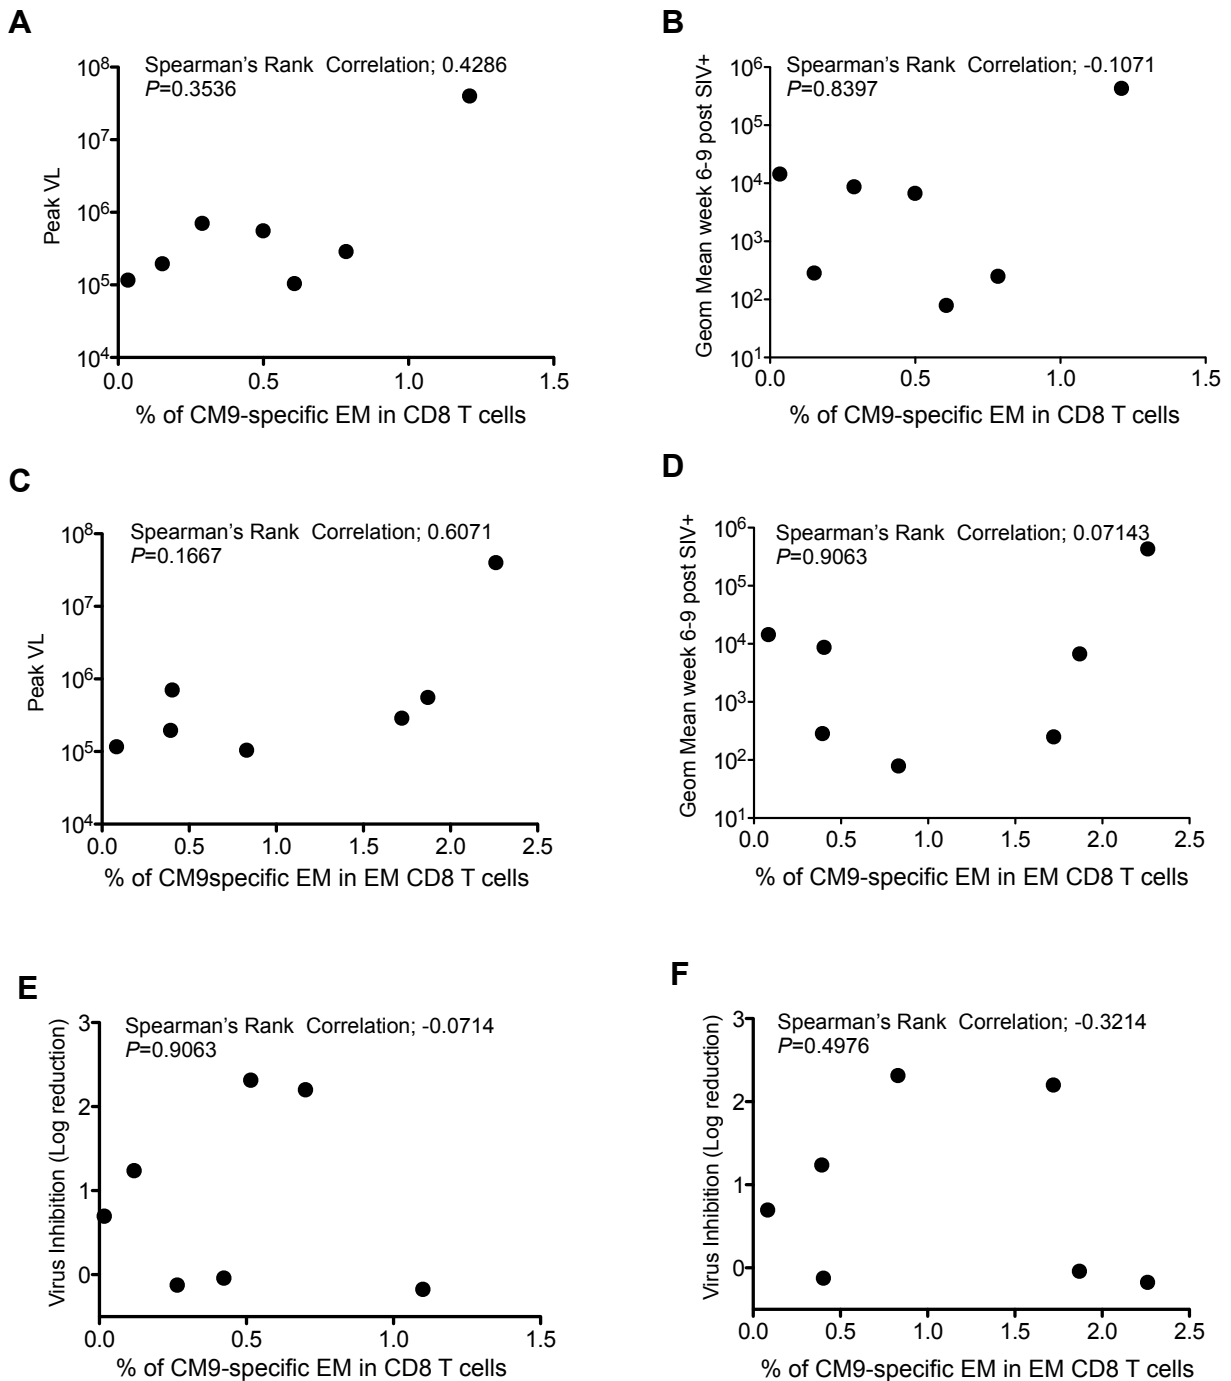

**Figure S2. Relationships between VL, VIA and the frequency of Gag CM9-specific EM CD8+ T cells.** (A, C) Correlations between % of CM9-specific EM CD8+ T cells in total CD8+ (A) or in EM CD8+ (C) T cells and mean peak log<sub>10</sub> VL. (B, D) Correlations between % of CM9-specific EM CD8+ T cells in total CD8+ (B) or in EM CD8+ (D) T cells and mean log<sub>10</sub> VL from week 6 to 9 after infection. (E, F) Correlations between % of CM9-specific EM CD8+ T cells in total CD8+ (E) or in EM CD8+ (F) T cells and VIA of EM CD8+ T cells.
